# Supplementary material
Source: PubMed Central journal article supplement (PMC4128880)
Supplement: cc-13-2349-s01.pdf [file cc-13-2349-s01.pdf]

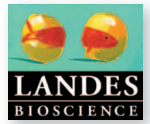

## **Supplemental Material to:**

**Min Hu, Yuhong Zou, Shashank Manohar Nambiar,  
Joonyong Lee, Yan Yang, and Guoli Dai**

**Keap1 modulates the redox cycle and hepatocyte cell  
cycle in regenerating liver**

**Cell Cycle 2014; 13(15)**

**<http://dx.doi.org/10.4161/cc.29298>**

**<http://www.landesbioscience.com/journals/cc/article/29298>**

Supplement Figure 1

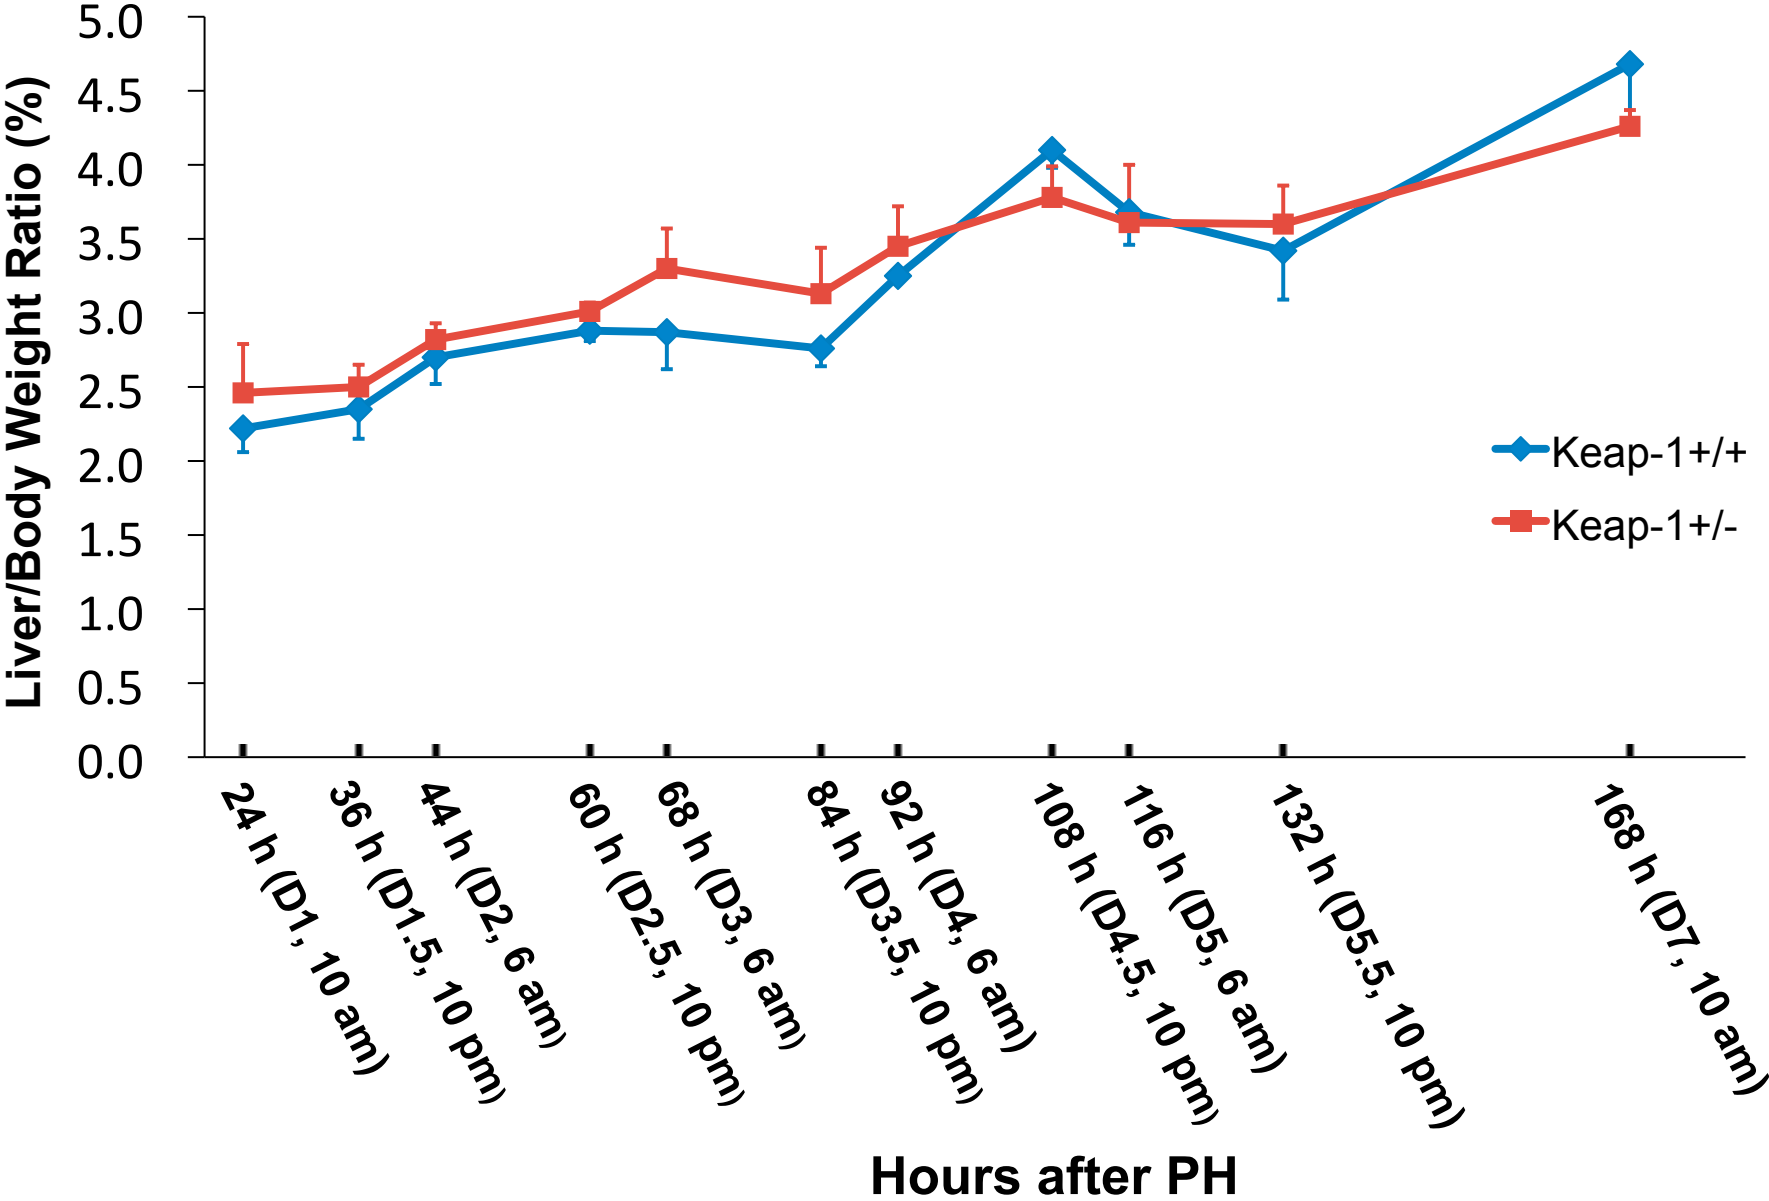

Supplement Figure 2

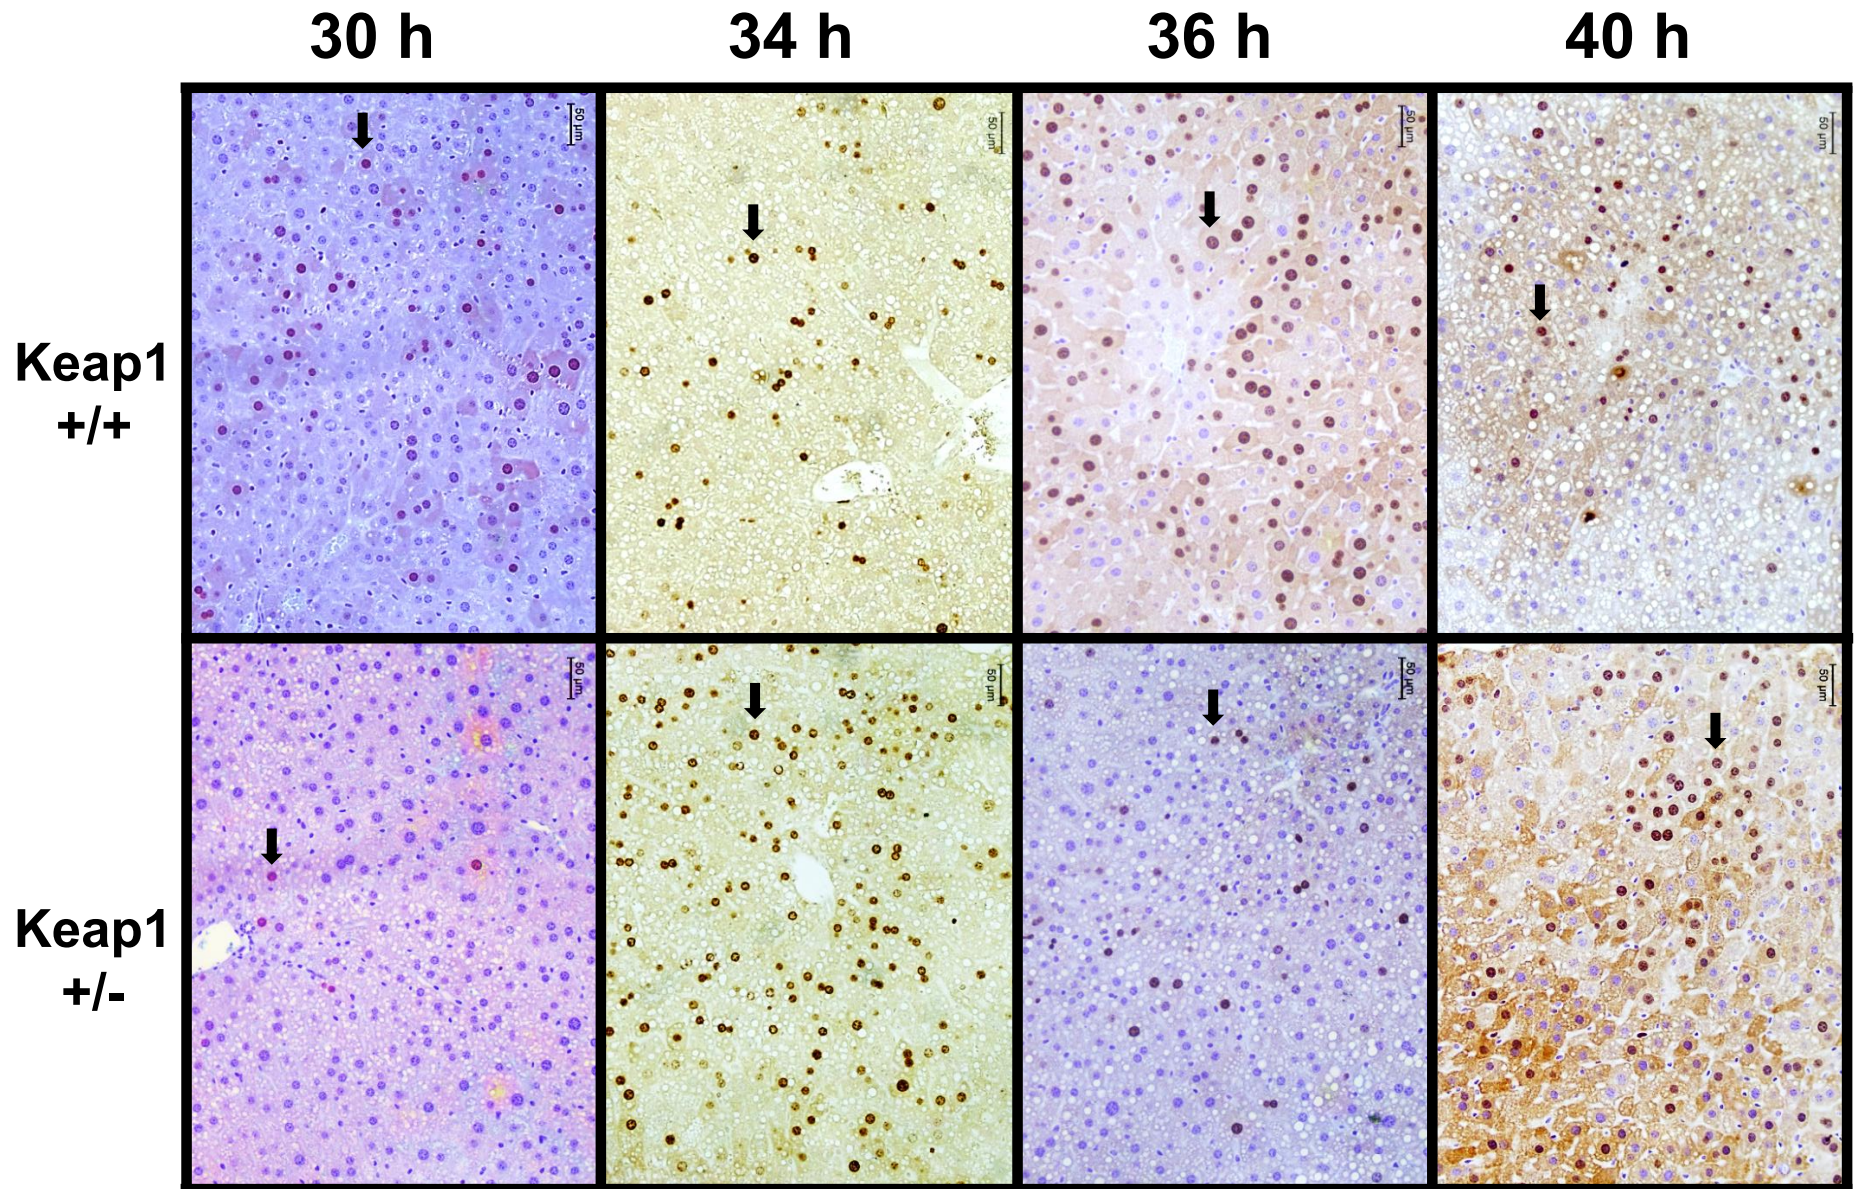



Supplement Figure 3

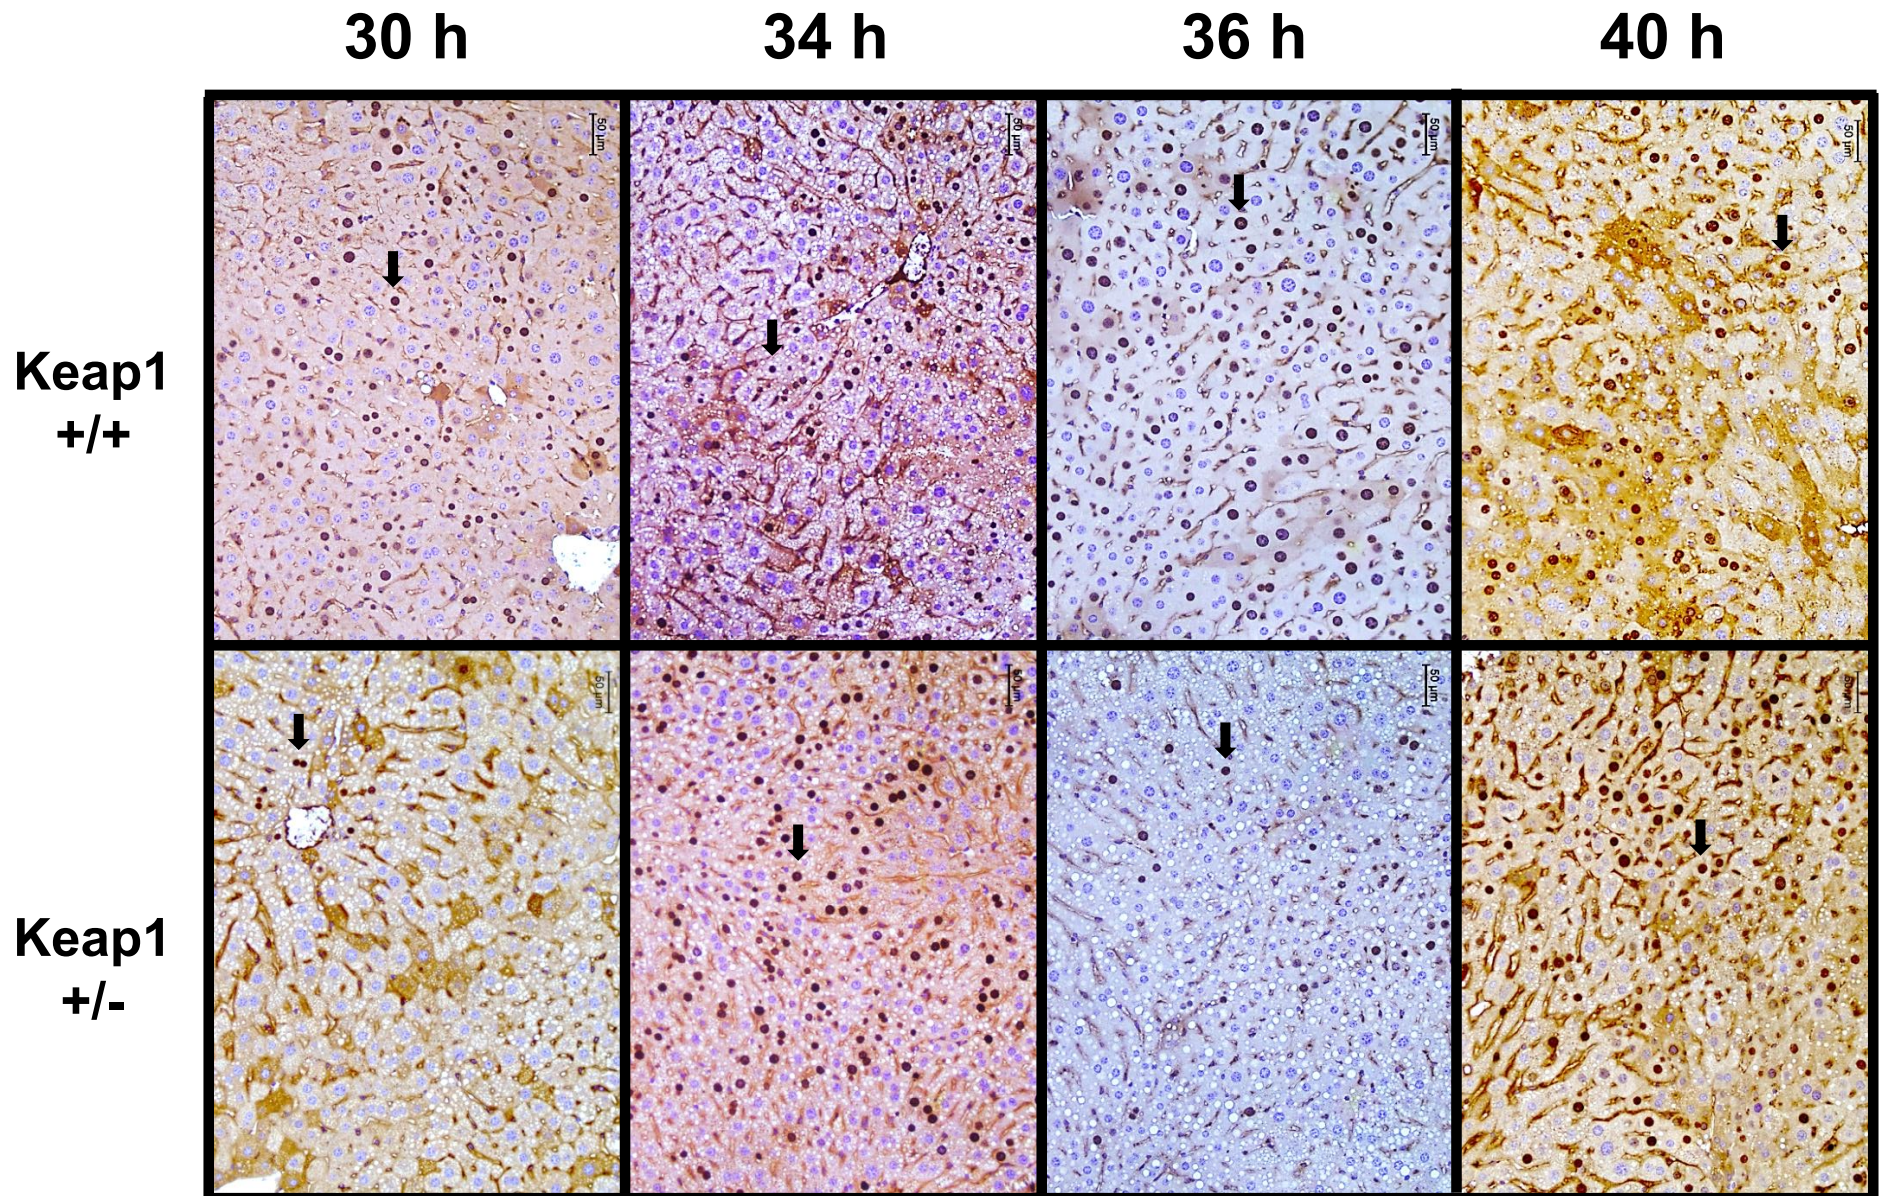



Suppl. Fig 4

44 h  
(D2, 6 am)

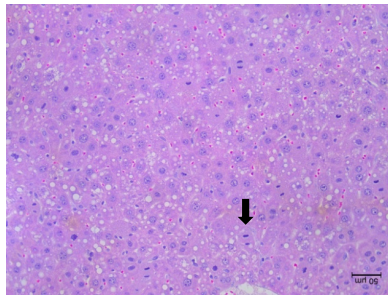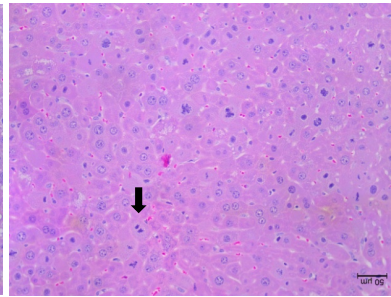

60 h  
(D2.5, 10 am)

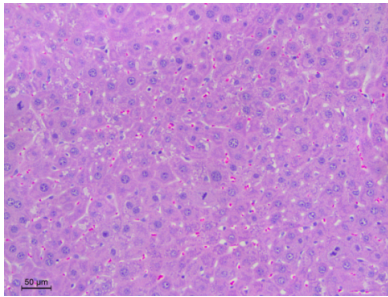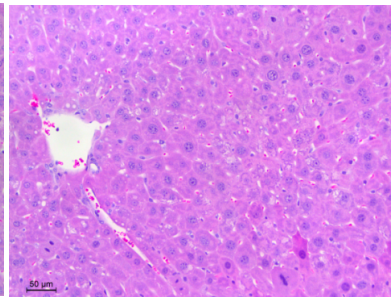

68 h  
(D3, 6 am)

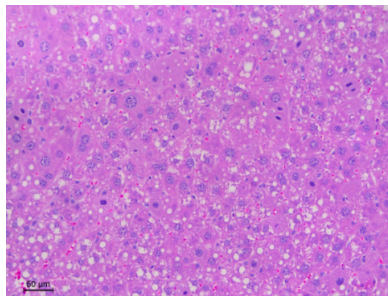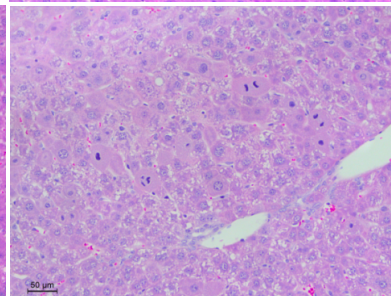

84 h  
(D3.5, 10 pm)

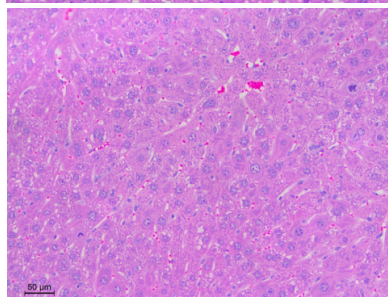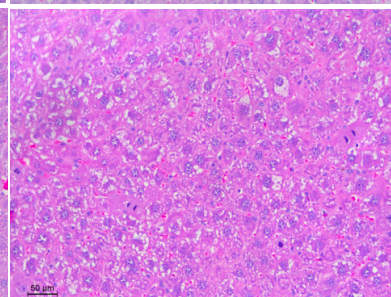

92 h  
(D4, 6 am)

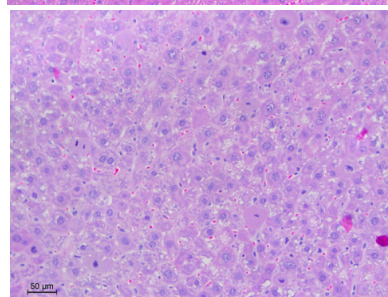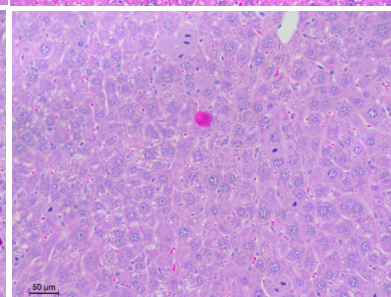

**Keap1+/+**

**Keap1+/-**

## Supplemental Materials

### Supplement Figure Legends

**Supplement Figure 1. Liver regrowth following partial hepatectomy (PH) in Keap1<sup>+/+</sup> and Keap1<sup>+/-</sup> mice.** Mice were subjected to PH and sacrificed at the indicated time points. Liver-to-body weight ratios were used as a liver regrowth index. The results are presented as the mean liver-to-body weight ratios  $\pm$  SD (n = 3-8 mice per genotype per time point).

**Supplement Figure 2. Representative liver sections subjected to Ki-67 immunostaining.** Mice were sacrificed at the indicated time points following partial hepatectomy. Ki-67 immunostaining was performed with liver sections. Ki67-positive hepatocyte nuclei were stained dark brown. Representative Ki67-positive hepatocyte nuclei are indicated by arrows.

**Supplement Figure 3. Representative liver sections subjected to BrdU immunostaining.** Mice were sacrificed at the indicated time points following partial hepatectomy. One hour prior to sacrifice, BrdU was injected into the mice (100 mg/kg, i.p.). Liver sections were subjected to BrdU immunostaining. BrdU-positive hepatocyte nuclei were stained dark brown. Representative BrdU-positive hepatocyte nuclei are indicated by arrows.

**Supplement Figure 4. Representative liver sections showing mitotic figures.** Mice were sacrificed at the indicated time points following partial hepatectomy. Liver sections were subjected to hematoxylin and eosin staining. Representative mitotic figures are indicated by arrows.
